# Supplementary material for: 3D Printed Microfluidic Features Using Dose Control in X, Y, and Z Dimensions
Source: PubMed Central journal article supplement (PMC6082287; doi:10.3390/mi9070326), 2018-06-28
Supplement: micromachines-09-00326-s001.pdf [file micromachines-09-00326-s001.pdf]

# Supplementary Materials: 3D printed microfluidic features using dose control in X, Y, and Z dimensions

Michael J. Beauchamp, Hua Gong, Adam T. Woolley and Gregory P. Nordin

The supplementary information contains all the images used for measurements of interior and exterior features. The standard deviation is given for each measurement at  $n = 3$ . The tables are organized as follows:

1. Exterior Features S1–S9
  - 1.1. Ridges S1–S3
    - 500 ms exposure S1
    - 1000 ms exposure S2
    - 1500 ms exposure S3
  - 1.2. Trenches with edge compensation S4–S6
    - 500 ms exposure S4
    - 1000 ms exposure S5
    - 1500 ms exposure S6
  - 1.3. Trenches without edge compensation S7–S9
    - 500 ms exposure S7
    - 1000 ms exposure S8
    - 1500 ms exposure S9
2. Interior Features S10–S21
  - 2.1. Ridges S10–S12
    - 500 ms exposure S10
    - 1000 ms exposure S11
    - 1500 ms exposure S12
  - 2.2. Trenches with edge compensation S13–S15
    - 500 ms exposure S13
    - 1000 ms exposure S14
    - 1500 ms exposure S15
  - 2.3. Trenches without edge compensation S16–S18
    - 500 ms exposure S16
    - 1000 ms exposure S17
    - 1500 ms exposure S18
  - 2.4. Pillars S19–S21
    - 500 ms exposure S19
    - 1000 ms exposure S20
    - 1500 ms exposure S21

## 1. Exterior Features

### 1.1. Ridges

|                                         |                                                                                   |                                                                                    |                                                                                     |                                                                                     |                                                                                     |
|-----------------------------------------|-----------------------------------------------------------------------------------|------------------------------------------------------------------------------------|-------------------------------------------------------------------------------------|-------------------------------------------------------------------------------------|-------------------------------------------------------------------------------------|
| Designed Trench Width ( $\mu\text{m}$ ) | 76.0 and 68.4                                                                     | 60.8 and 53.2                                                                      | 45.6 and 38.0                                                                       | 30.4 and 22.8                                                                       | 15.2 and 7.6                                                                        |
| Measured Trench Width ( $\mu\text{m}$ ) | $62.0 \pm 0.9$ and $55.3 \pm 1.0$                                                 | $48.5 \pm 2.2$ and $40.6 \pm 0.9$                                                  | $30.7 \pm 0.8$ and $23.4 \pm 0.2$                                                   | $16.1 \pm 1.3$ and $7.5 \pm 0.5$                                                    | $3.2 \pm 0.3$ and -                                                                 |
| Image                                   |  |  |  |  |  |

**Figure S1.** Exterior ridges exposed for 500 ms. Widths range from 10 to 1 pixels from left to right. The designed and measured widths are given as well as images of the ridges.

|                                         |                                                                                    |                                                                                     |                                                                                      |                                                                                      |                                                                                      |
|-----------------------------------------|------------------------------------------------------------------------------------|-------------------------------------------------------------------------------------|--------------------------------------------------------------------------------------|--------------------------------------------------------------------------------------|--------------------------------------------------------------------------------------|
| Designed Trench Width ( $\mu\text{m}$ ) | 76.0 and 68.4                                                                      | 60.8 and 53.2                                                                       | 45.6 and 38.0                                                                        | 30.4 and 22.8                                                                        | 15.2 and 7.6                                                                         |
| Measured Trench Width ( $\mu\text{m}$ ) | $72.0 \pm 0.3$ and $64.4 \pm 0.5$                                                  | $56.8 \pm 0.3$ and $48.4 \pm 0.6$                                                   | $40.6 \pm 0.2$ and $32.8 \pm 0.9$                                                    | $24.9 \pm 0.7$ and $16.3 \pm 1.5$                                                    | $7.2 \pm 0.7$ and $2.9 \pm 0.4$                                                      |
| Image                                   |  |  |  |  |  |

**Figure S2.** Exterior ridges exposed for 1000 ms. Widths range from 1 to 10 pixels from left to right. The designed and measured widths are given as well as images of the ridges.

|                                         |                                                                                   |                                                                                    |                                                                                     |                                                                                     |                                                                                     |
|-----------------------------------------|-----------------------------------------------------------------------------------|------------------------------------------------------------------------------------|-------------------------------------------------------------------------------------|-------------------------------------------------------------------------------------|-------------------------------------------------------------------------------------|
| Designed Trench Width ( $\mu\text{m}$ ) | 76.0 and 68.4                                                                     | 60.8 and 53.2                                                                      | 45.6 and 38.0                                                                       | 30.4 and 22.8                                                                       | 15.2 and 7.6                                                                        |
| Measured Trench Width ( $\mu\text{m}$ ) | $77.1 \pm 0.3$ and $69.2 \pm 0.4$                                                 | $61.7 \pm 0.2$ and $54.0 \pm 0.3$                                                  | $45.9 \pm 0.3$ and $37.9 \pm 0.3$                                                   | $29.8 \pm 1.1$ and $25.3 \pm 1.3$                                                   | $15.1 \pm 0.6$ and $7.1 \pm 0.8$                                                    |
| Image                                   | 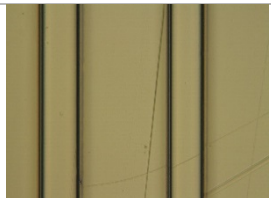 |  |  |  |  |

**Figure S3.** Exterior ridges exposed for 1500 ms. Widths range from 1 to 10 pixels from left to right. The designed and measured widths are given as well as images of the ridges.

1.2. Trenches with edge compensation

|                                         |                                                                                    |                                                                                     |                                                                                      |                                                                                      |                                                                                      |
|-----------------------------------------|------------------------------------------------------------------------------------|-------------------------------------------------------------------------------------|--------------------------------------------------------------------------------------|--------------------------------------------------------------------------------------|--------------------------------------------------------------------------------------|
| Designed Trench Width ( $\mu\text{m}$ ) | 76.0                                                                               | 68.4                                                                                | 60.8                                                                                 | 53.2                                                                                 | 45.6                                                                                 |
| Measured Trench Width ( $\mu\text{m}$ ) | $77.3 \pm 0.6$                                                                     | $68.7 \pm 0.3$                                                                      | $61.7 \pm 0.4$                                                                       | $50.5 \pm 0.6$                                                                       | $38.9 \pm 0.4$                                                                       |
| Image                                   |   |   |   |   |   |
| Designed Trench Width ( $\mu\text{m}$ ) | 38.0                                                                               | 30.4                                                                                | 22.8                                                                                 | 15.2                                                                                 | 7.6                                                                                  |
| Measured Trench Width ( $\mu\text{m}$ ) | $28.6 \pm 0.7$                                                                     | $5.5 \pm 0.6$                                                                       | -                                                                                    | -                                                                                    | -                                                                                    |
| Image                                   |  |  |  |  |  |

**Figure S4.** Exterior trenches with edge compensation exposed for 500 ms. Widths range from 10 to 1 pixels from left to right across two rows. The designed and measured widths are given as well as images of the trenches.

|                                         |                                                                                   |                                                                                    |                                                                                     |                                                                                     |                                                                                     |
|-----------------------------------------|-----------------------------------------------------------------------------------|------------------------------------------------------------------------------------|-------------------------------------------------------------------------------------|-------------------------------------------------------------------------------------|-------------------------------------------------------------------------------------|
| Designed Trench Width ( $\mu\text{m}$ ) | 76.0                                                                              | 68.4                                                                               | 60.8                                                                                | 53.2                                                                                | 45.6                                                                                |
| Measured Trench Width ( $\mu\text{m}$ ) | $62.8 \pm 0.2$                                                                    | $53.5 \pm 0.5$                                                                     | $43.6 \pm 0.6$                                                                      | $33.5 \pm 0.3$                                                                      | $20.7 \pm 0.4$                                                                      |
| Image                                   |  |  |  |  |  |
| Designed Trench Width ( $\mu\text{m}$ ) | 38.0                                                                              | 30.4                                                                               | 22.8                                                                                | 15.2                                                                                | 7.6                                                                                 |
| Measured Trench Width ( $\mu\text{m}$ ) | $13.1 \pm 1.9$                                                                    | -                                                                                  | -                                                                                   | -                                                                                   | -                                                                                   |
| Image                                   |  |  |  |  |  |

**Figure S5.** Exterior trenches with edge compensation exposed for 1000 ms. Widths range from 10 to 1 pixels from left to right across two rows. The designed and measured widths are given as well as images of the trenches.

|                                         |                                                                                   |                                                                                    |                                                                                     |                                                                                     |                                                                                     |
|-----------------------------------------|-----------------------------------------------------------------------------------|------------------------------------------------------------------------------------|-------------------------------------------------------------------------------------|-------------------------------------------------------------------------------------|-------------------------------------------------------------------------------------|
| Designed Trench Width ( $\mu\text{m}$ ) | 76.0                                                                              | 68.4                                                                               | 60.8                                                                                | 53.2                                                                                | 45.6                                                                                |
| Measured Trench Width ( $\mu\text{m}$ ) | $52.0 \pm 0.3$                                                                    | $42.9 \pm 0.5$                                                                     | $31.8 \pm 0.2$                                                                      | $22.2 \pm 0.5$                                                                      | $11.4 \pm 0.4$                                                                      |
| Image                                   | 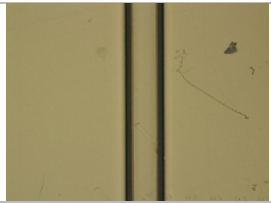 |  |  |  |  |
| Designed Trench Width ( $\mu\text{m}$ ) | 38.0                                                                              | 30.4                                                                               | 22.8                                                                                | 15.2                                                                                | 7.6                                                                                 |
| Measured Trench Width ( $\mu\text{m}$ ) | $9.3 \pm 0.7$                                                                     | -                                                                                  | -                                                                                   | -                                                                                   | -                                                                                   |
| Image                                   |  |  |  |  |  |

**Figure S6.** Exterior trenches with edge compensation exposed for 1500 ms. Widths range from 10 to 1 pixels from left to right across two rows. The designed and measured widths are given as well as images of the trenches.

1.3. Trenches without edge compensation

|                                         |                                                                                   |                                                                                    |                                                                                     |                                                                                     |                                                                                     |
|-----------------------------------------|-----------------------------------------------------------------------------------|------------------------------------------------------------------------------------|-------------------------------------------------------------------------------------|-------------------------------------------------------------------------------------|-------------------------------------------------------------------------------------|
| Designed Trench Width ( $\mu\text{m}$ ) | 76.0                                                                              | 68.4                                                                               | 60.8                                                                                | 53.2                                                                                | 45.6                                                                                |
| Measured Trench Width ( $\mu\text{m}$ ) | $81.9 \pm 0.5$                                                                    | $74.3 \pm 0.6$                                                                     | $66.7 \pm 0.9$                                                                      | $58.1 \pm 0.5$                                                                      | $49.0 \pm 1.2$                                                                      |
| Image                                   |  |  |  |  |  |
| Designed Trench Width ( $\mu\text{m}$ ) | 38.0                                                                              | 30.4                                                                               | 22.8                                                                                | 15.2                                                                                | 7.6                                                                                 |
| Measured Trench Width ( $\mu\text{m}$ ) | $41.7 \pm 0.4$                                                                    | $21.1 \pm 0.6$                                                                     | $14.2 \pm 0.6$                                                                      | $10.1 \pm 0.4$                                                                      | -                                                                                   |
| Image                                   |  |  |  |  |  |

**Figure S7.** Exterior trenches without edge compensation exposed for 500 ms. Widths range from 10 to 1 pixels from left to right. The designed and measured widths are given as well as images of the trenches.

|                                         |                                                                                   |                                                                                    |                                                                                     |                                                                                     |                                                                                     |
|-----------------------------------------|-----------------------------------------------------------------------------------|------------------------------------------------------------------------------------|-------------------------------------------------------------------------------------|-------------------------------------------------------------------------------------|-------------------------------------------------------------------------------------|
| Designed Trench Width ( $\mu\text{m}$ ) | 76.0                                                                              | 68.4                                                                               | 60.8                                                                                | 53.2                                                                                | 45.6                                                                                |
| Measured Trench Width ( $\mu\text{m}$ ) | $72.4 \pm 0.3$                                                                    | $64.3 \pm 0.4$                                                                     | $55.6 \pm 0.2$                                                                      | $44.9 \pm 0.5$                                                                      | $33.6 \pm 0.4$                                                                      |
| Image                                   |  |  |  |  |  |
| Designed Trench Width ( $\mu\text{m}$ ) | 38.0                                                                              | 30.4                                                                               | 22.8                                                                                | 15.2                                                                                | 7.6                                                                                 |
| Measured Trench Width ( $\mu\text{m}$ ) | $21.1 \pm 0.3$                                                                    | $12.9 \pm 1.5$                                                                     | $11.5 \pm 0.9$                                                                      | -                                                                                   | -                                                                                   |
| Image                                   |  |  |  |  |  |

**Figure S8.** Exterior trenches without edge compensation exposed for 1000 ms. Widths range from 10 to 1 pixels from left to right across two rows. The designed and measured widths are given as well as images of the trenches.

|                                         |                                                                                   |                                                                                    |                                                                                     |                                                                                     |                                                                                     |
|-----------------------------------------|-----------------------------------------------------------------------------------|------------------------------------------------------------------------------------|-------------------------------------------------------------------------------------|-------------------------------------------------------------------------------------|-------------------------------------------------------------------------------------|
| Designed Trench Width ( $\mu\text{m}$ ) | 76.0                                                                              | 68.4                                                                               | 60.8                                                                                | 53.2                                                                                | 45.6                                                                                |
| Measured Trench Width ( $\mu\text{m}$ ) | $62.4 \pm 0.2$                                                                    | $53.6 \pm 0.1$                                                                     | $44.2 \pm 0.4$                                                                      | $33.8 \pm 0.2$                                                                      | $24.7 \pm 0.6$                                                                      |
| Image                                   |  |  |  |  |  |
| Designed Trench Width ( $\mu\text{m}$ ) | 38.0                                                                              | 30.4                                                                               | 22.8                                                                                | 15.2                                                                                | 7.6                                                                                 |
| Measured Trench Width ( $\mu\text{m}$ ) | $16.5 \pm 0.3$                                                                    | $8.6 \pm 0.7$                                                                      | -                                                                                   | -                                                                                   | -                                                                                   |
| Image                                   |  |  |  |  |  |

**Figure S9.** Exterior trenches without edge compensation exposed for 1500 ms. Widths range from 10 to 1 pixels from left to right across two rows. The designed and measured widths are given as well as images of the trenches.

## 2. Interior Features

### 2.1. Ridges

|                                           |                                                                                     |                                                                                      |                                                                                       |                                                                                       |                                                                                       |
|-------------------------------------------|-------------------------------------------------------------------------------------|--------------------------------------------------------------------------------------|---------------------------------------------------------------------------------------|---------------------------------------------------------------------------------------|---------------------------------------------------------------------------------------|
| Designed Ridge Height (layers)            | 1 and 2                                                                             | 3 and 4                                                                              | 5 and 6                                                                               | 7 and 8                                                                               | 9 and 10                                                                              |
| Measured Ridge Height ( $\mu\text{m}$ )   | 9.8 and 18.1                                                                        | 18.8 and 27.8                                                                        | 33.8 and 38.0                                                                         | 55.7 and 40.1                                                                         | 78.5 and 79.9                                                                         |
| Measured Gap to Ceiling ( $\mu\text{m}$ ) | $129.3 \pm 0.4$ and $126.3 \pm 0.8$                                                 | $127.8 \pm 2.0$ and $102.3 \pm 0.9$                                                  | $87.2 \pm 5.0$ and $94.7 \pm 3.1$                                                     | $78.2 \pm 4.6$ and $90.8 \pm 2.8$                                                     | $44.8 \pm 2.3$ and $32.1 \pm 0.4$                                                     |
| Image                                     | 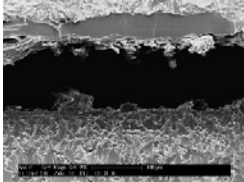 |  |  |  |  |

**Figure S10.** Interior ridges exposed for 500 ms. Heights range from 1 to 10 layers from left to right. The designed height, measured height, and height from top of the ridge to the top of the void feature (gap height), are given, as well as images of the ridges.



|                                           |                                                                                   |                                                                                    |                                                                                     |                                                                                     |                                                                                     |
|-------------------------------------------|-----------------------------------------------------------------------------------|------------------------------------------------------------------------------------|-------------------------------------------------------------------------------------|-------------------------------------------------------------------------------------|-------------------------------------------------------------------------------------|
| Designed Ridge Height (layers)            | 1 and 2                                                                           | 3 and 4                                                                            | 5 and 6                                                                             | 7 and 8                                                                             | 9 and 10                                                                            |
| Measured Ridge Height ( $\mu\text{m}$ )   | 9.7 and 18.2                                                                      | 27.9 and 37.7                                                                      | 46.1 and 55.2                                                                       | 63.6 and 72.1                                                                       | 70.1 and 72.1                                                                       |
| Measured Gap to Ceiling ( $\mu\text{m}$ ) | $69.5 \pm 1.0$ and $58.4 \pm 0.8$                                                 | $39.6 \pm 0.7$ and $27.3 \pm 0.7$                                                  | $27.9 \pm 1.0$ and $18.2 \pm 1.0$                                                   | $7.1 \pm 0.4$ and -                                                                 | - and -                                                                             |
| Image                                     | 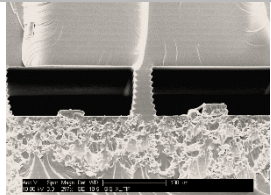 |  |  |  |  |

**Figure S11.** Interior ridges exposed for 1000 ms. Heights range from 1 to 10 layers from left to right. The designed height, measured height, and height from top of the ridge to the top of the void feature (gap height), are given, as well as images of the ridges.

|                                           |                                                                                   |                                                                                    |                                                                                     |                                                                                     |                                                                                     |
|-------------------------------------------|-----------------------------------------------------------------------------------|------------------------------------------------------------------------------------|-------------------------------------------------------------------------------------|-------------------------------------------------------------------------------------|-------------------------------------------------------------------------------------|
| Designed Ridge Height (layers)            | 10, 9, and 8                                                                      | 7 and 6                                                                            | 5 and 4                                                                             | 3 and 2                                                                             | 2 and 1                                                                             |
| Measured Ridge Height ( $\mu\text{m}$ )   | 77.6, 74.8, and 73.5                                                              | 69.4 and 62.6                                                                      | 48.3 and 38.8                                                                       | 29.3 and 19.1                                                                       | 19.1 and 9.5                                                                        |
| Measured Gap to Ceiling ( $\mu\text{m}$ ) | -, -, and -                                                                       | $6.8 \pm 0.7$ and $17.7 \pm 0.4$                                                   | $19.7 \pm 1.2$ and $33.3 \pm 0.7$                                                   | $42.9 \pm 0.4$ and $55.1 \pm 0.7$                                                   | $55.1 \pm 0.7$ and $63.3 \pm 0.7$                                                   |
| Image                                     | 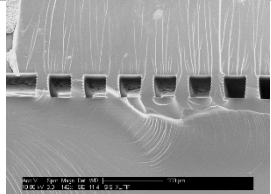 |  |  |  |  |

**Figure S12.** Interior ridges exposed for 1500 ms. Heights range from 10 to 1 layers from left to right. The designed height, measured height, and height from top of the ridge to the top of the void feature (gap height), are given, as well as images of the ridges.

2.2. Trenches with edge compensation

|                                         |                                                                                   |                                                                                    |                                                                                     |                                                                                     |                                                                                     |
|-----------------------------------------|-----------------------------------------------------------------------------------|------------------------------------------------------------------------------------|-------------------------------------------------------------------------------------|-------------------------------------------------------------------------------------|-------------------------------------------------------------------------------------|
| Designed Trench Width ( $\mu\text{m}$ ) | 7.6 and 15.2                                                                      | 22.8 and 30.4                                                                      | 38.0 and 45.6                                                                       | 53.2 and 60.8                                                                       | 68.4 and 76.0                                                                       |
| Measured Trench Width ( $\mu\text{m}$ ) | - and -                                                                           | - and $25.1 \pm 0.9$                                                               | $37.3 \pm 1.2$ and $50.4 \pm 0.8$                                                   | $58.1 \pm 1.2$ and $69.2 \pm 0.8$                                                   | $77.4 \pm 0.8$ and $84.7 \pm 0.9$                                                   |
| Image                                   | 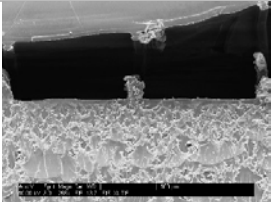 |  |  |  |  |

**Figure S13.** Interior trenches with edge compensation exposed for 500 ms. Widths range from 1 to 10 pixels from left to right. The designed and measured widths are given as well as images of the trenches.

|                                         |                                                                                   |                                                                                     |                                                                                     |
|-----------------------------------------|-----------------------------------------------------------------------------------|-------------------------------------------------------------------------------------|-------------------------------------------------------------------------------------|
| Designed Trench Width ( $\mu\text{m}$ ) | 76.0, 68.4 and 60.8                                                               | 53.2, 45.6, 38.0 and 30.4                                                           | 22.8, 15.2, and 7.6                                                                 |
| Measured Trench Width ( $\mu\text{m}$ ) | $71.4 \pm 1.3$ , $62.8 \pm 1.5$ , and $52.8 \pm 0.8$                              | $42.4 \pm 0.8$ , $34.2 \pm 0.8$ , $21.6 \pm 0.8$ , and -                            | -, -, and -                                                                         |
| Image                                   | 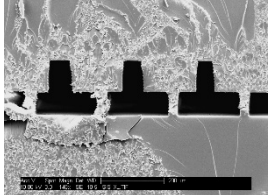 |  |  |

**Figure S14.** Interior trenches with edge compensation exposed for 1000 ms. Widths range from 10 to 1 pixels from left to right. The designed and measured widths are given as well as images of the trenches.

|                                         |                                                                                   |                                                                                    |                                                                                     |                                                                                     |
|-----------------------------------------|-----------------------------------------------------------------------------------|------------------------------------------------------------------------------------|-------------------------------------------------------------------------------------|-------------------------------------------------------------------------------------|
| Designed Trench Width ( $\mu\text{m}$ ) | 7.6 and 15.2                                                                      | 22.8, 30.4, 38.0, and 45.6                                                         | 53.2 and 60.8                                                                       | 68.4 and 76.0                                                                       |
| Measured Trench Width ( $\mu\text{m}$ ) | - and -                                                                           | -, -, -, and -                                                                     | $17.7 \pm 0.7$ and $30.8 \pm 1.0$                                                   | $43.1 \pm 0.8$ and $55.8 \pm 0.7$                                                   |
| Image                                   | 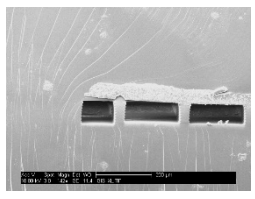 |  |  |  |

**Figure S15.** Interior trenches with edge compensation exposed for 1500 ms. Widths range from 1 to 10 pixels from left to right. The designed and measured widths are given as well as images of the trenches.

2.3. Trenches without edge compensation

|                                         |                                                                                   |                                                                                    |                                                                                     |                                                                                     |                                                                                     |
|-----------------------------------------|-----------------------------------------------------------------------------------|------------------------------------------------------------------------------------|-------------------------------------------------------------------------------------|-------------------------------------------------------------------------------------|-------------------------------------------------------------------------------------|
| Designed Trench Width ( $\mu\text{m}$ ) | 7.6 and 15.2                                                                      | 22.8 and 30.4                                                                      | 38.0 and 45.6                                                                       | 53.2 and 60.8                                                                       | 68.4 and 76.0                                                                       |
| Measured Trench Width ( $\mu\text{m}$ ) | - and -                                                                           | $30.8 \pm 0.8$ and $39.1 \pm 0.8$                                                  | $50.9 \pm 0.4$ and $54.4 \pm 0.9$                                                   | $57.9 \pm 0.8$ and $66.9 \pm 0.8$                                                   | $83.2 \pm 0.9$ and $94.7 \pm 1.3$                                                   |
| Image                                   | 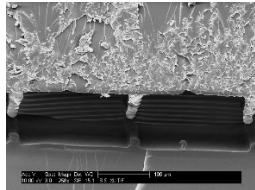 |  |  |  |  |

**Figure S16.** Interior trenches without edge compensation exposed for 500 ms. Widths range from 1 to 10 pixels from left to right. The designed and measured widths are given as well as images of the trenches.

|                                         |                                                                                   |                                                                                    |                                                                                     |                                                                                     |                                                                                     |
|-----------------------------------------|-----------------------------------------------------------------------------------|------------------------------------------------------------------------------------|-------------------------------------------------------------------------------------|-------------------------------------------------------------------------------------|-------------------------------------------------------------------------------------|
| Designed Trench Width ( $\mu\text{m}$ ) | 76.0 and 68.4                                                                     | 60.8 and 53.2                                                                      | 45.6 and 38.0                                                                       | 30.4 and 22.8                                                                       | 15.2 and 7.6                                                                        |
| Measured Trench Width ( $\mu\text{m}$ ) | $80.1 \pm 0.4$ and $71.0 \pm 0.7$                                                 | $61.0 \pm 0.7$ and $46.3 \pm 0.8$                                                  | $40.7 \pm 1.5$ and $27.9 \pm 0.7$                                                   | - and -                                                                             | - and -                                                                             |
| Image                                   | 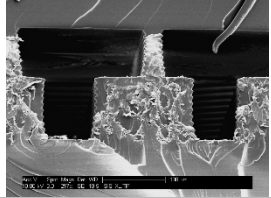 |  |  |  |  |

**Figure S17.** Interior trenches without edge compensation exposed for 1000 ms. Widths range from 10 to 1 pixels from left to right. The designed and measured widths are given as well as images of the trenches.

|                                         |                                                                                   |                                                                                    |                                                                                     |                                                                                     |
|-----------------------------------------|-----------------------------------------------------------------------------------|------------------------------------------------------------------------------------|-------------------------------------------------------------------------------------|-------------------------------------------------------------------------------------|
| Designed Trench Width ( $\mu\text{m}$ ) | 7.6, 15.2, 22.8, and 30.4                                                         | 38.0 and 45.6                                                                      | 53.2 and 60.8                                                                       | 68.4 and 76.0                                                                       |
| Measured Trench Width ( $\mu\text{m}$ ) | -, -, -, and -                                                                    | - and $21.8 \pm 0.7$                                                               | $34.0 \pm 0.4$ and $42.8 \pm 0.7$                                                   | $57.6 \pm 0.4$ and $67.4 \pm 0.7$                                                   |
| Image                                   | 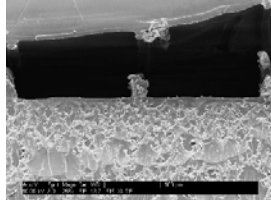 |  |  |  |

**Figure S18.** Interior trenches without edge compensation exposed for 1500 ms. Widths range from 1 to 10 pixels from left to right. The designed and measured widths are given as well as images of the trenches.

2.4. Pillars

|                                            |                                                                                   |                                                                                    |                                                                                     |                                                                                     |                                                                                     |
|--------------------------------------------|-----------------------------------------------------------------------------------|------------------------------------------------------------------------------------|-------------------------------------------------------------------------------------|-------------------------------------------------------------------------------------|-------------------------------------------------------------------------------------|
| Designed Pillar Diameter ( $\mu\text{m}$ ) | 7.6, 15.2, and 22.8                                                               | 30.4 and 38.0                                                                      | 45.6 and 53.2                                                                       | 60.8 and 68.4                                                                       | 76.0                                                                                |
| Measured Pillar Diameter ( $\mu\text{m}$ ) | -, -, and -                                                                       | - and -                                                                            | $19.3 \pm 0.4$ and $21.1 \pm 0.8$                                                   | $31.1 \pm 0.4$ and $40.4 \pm 0.4$                                                   | $49.4 \pm 0.4$                                                                      |
| Image                                      | 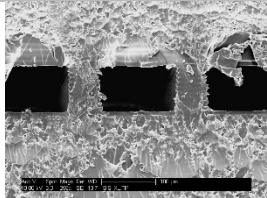 |  |  |  |  |

**Figure S19**-Interior pillars exposed for 500 ms. Widths range from 1 to 10 pixels from left to right. The designed and measured diameters are given as well as images of the pillars.

|                                            |                                                                                   |                                                                                    |                                                                                     |                                                                                     |                                                                                     |
|--------------------------------------------|-----------------------------------------------------------------------------------|------------------------------------------------------------------------------------|-------------------------------------------------------------------------------------|-------------------------------------------------------------------------------------|-------------------------------------------------------------------------------------|
| Designed Pillar Diameter ( $\mu\text{m}$ ) | 76.0 and 68.4                                                                     | 60.8 and 53.2                                                                      | 45.6 and 38.0                                                                       | 30.4 and 22.8                                                                       | 15.2 and 7.6                                                                        |
| Measured Pillar Diameter ( $\mu\text{m}$ ) | $48.5 \pm 0.8$ and $50.2 \pm 0.8$                                                 | $47.2 \pm 0.8$ and $35.1 \pm 0.1$                                                  | $33.6 \pm 0.8$ and $16.7 \pm 0.4$                                                   | $13.6 \pm 1.1$ and -                                                                | - and -                                                                             |
| Image                                      | 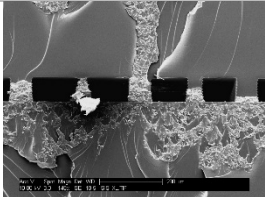 |  |  |  |  |

**Figure S20**. Interior pillars exposed for 1000 ms. Widths range from 10 to 1 pixels from left to right. The designed and measured diameters are given as well as images of the pillars.

|                                            |                                                                                   |                                                                                    |                                                                                     |
|--------------------------------------------|-----------------------------------------------------------------------------------|------------------------------------------------------------------------------------|-------------------------------------------------------------------------------------|
| Designed Pillar Diameter ( $\mu\text{m}$ ) | 7.6, 15.2, 22.8 and 30.4                                                          | 38.0, 45.6, and 53.2                                                               | 60.8, 68.4 and 76.0                                                                 |
| Measured Pillar Diameter ( $\mu\text{m}$ ) | -, $12.2 \pm 2.4$ , -, and $18.6 \pm 0.8$                                         | $24.9 \pm 0.8$ , $36.3 \pm 0.8$ , and $41.7 \pm 0.8$                               | $52.6 \pm 0.8$ , $58.0 \pm 1.6$ , and $68.5 \pm 0.8$                                |
| Image                                      | 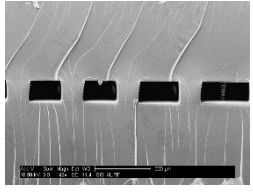 |  |  |

**Figure S21.** Interior pillars exposed for 1500 ms. Widths range from 1 to 10 pixels from left to right. The designed and measured diameters are given as well as images of the pillars.
